# Supplementary material
Source: MDPI journal article supplement (https://www.mdpi.com/2227-7080/9/3/54)
Supplement: s1 [file s1 › technologies-1238458-supplementary.pdf]

Supplementary Materials:

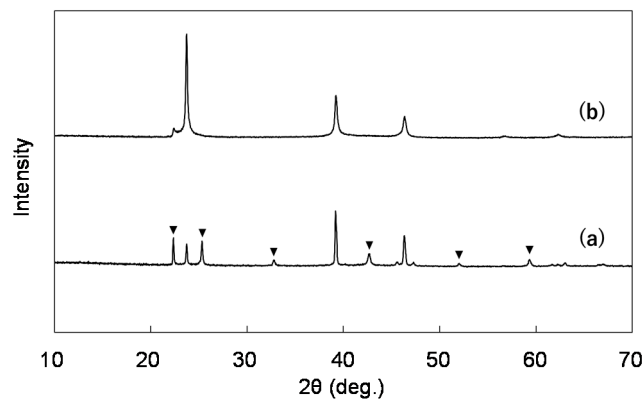

**Figure S1.** Demonstration of the pressure-induced phase transition from  $\beta$ - to  $\gamma$ -AgI—the peaks indicated using ▼ correspond to  $\beta$ -AgI (ICDD # 9–374); the unmarked peaks are  $\gamma$ -AgI (ICDD # 9–399); the sample heated at 148 °C was a mixture of  $\beta$ - and  $\gamma$ -AgI (a) and uniaxial pressing preferentially suppressed  $\beta$ -AgI (b)

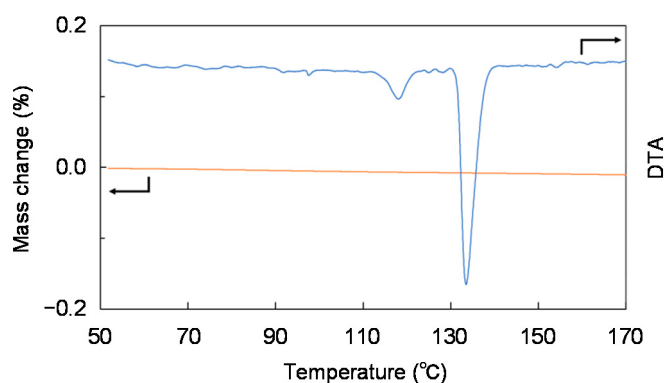

**Figure S2.** Thermogravimetry-differential thermal analysis curves of  $x$  Ag<sub>2</sub>CO<sub>3</sub>–(1 –  $x$ ) AgI at  $x = 5\%$

**Table S1.** Fitting results of the Rietveld method

| $x$          | 1%          | 2%          | 3%         | 4%          | 5%          |
|--------------|-------------|-------------|------------|-------------|-------------|
| $R_{wp}/R_p$ | 0.036/0.027 | 0.036/0.026 | 0.04/0.029 | 0.035/0.026 | 0.034/0.025 |
| $S$          | 1.64        | 1.57        | 1.75       | 1.51        | 1.51        |
